# Supplementary material for: MiR-130b modulates the invasive, migratory, and metastatic behavior of leiomyosarcoma
Source: PubMed Central journal article supplement (PMC9879492; doi:10.1371/journal.pone.0278844), 2023-01-26

## S1 Raw Images

Unadjusted blot images for Fig. 3D. Load order (L-R; boxed region): 1. SCR 2. miR-130b 3. SCR 4. miR-130b. Images are film exposures ranging from 20 s to 2 min.

### TSC1:

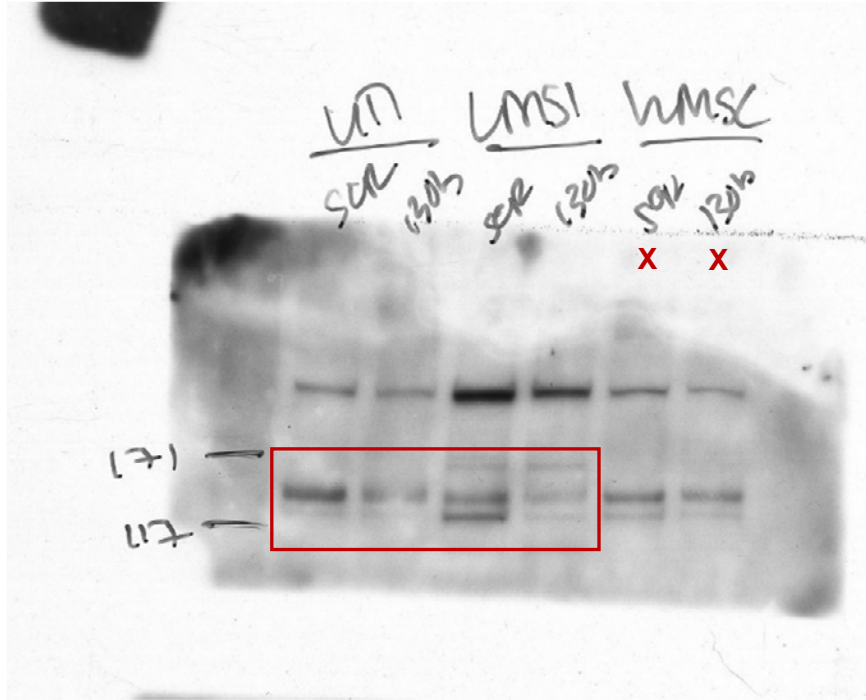

### Tubulin:

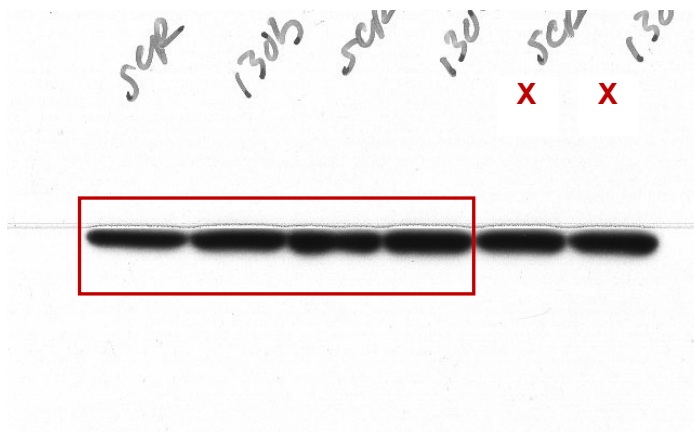

Unadjusted blot images for Fig. 5D. Load order (L-R; boxed region): 1. Cntrl 2. as-miR-130b 3. Cntrl 4. miR-130b. Images are film exposures ranging from 20 s to 2 min.

**Rho GTP:**

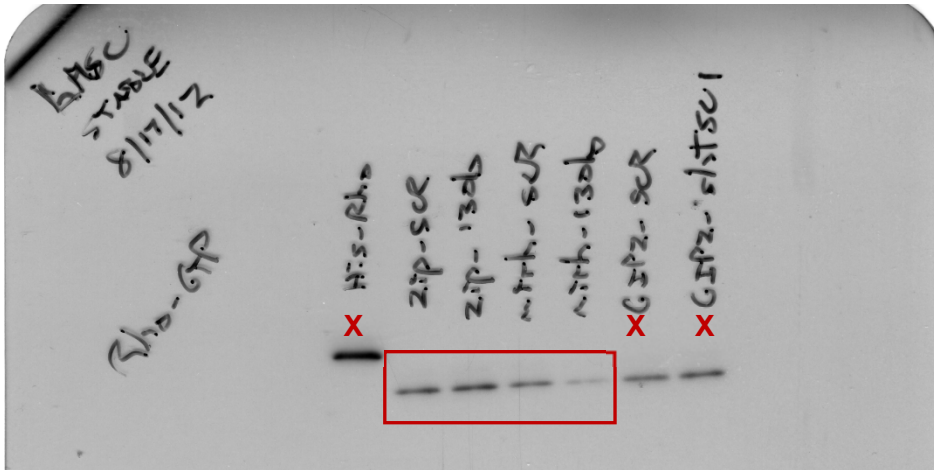

**Rho-total:**

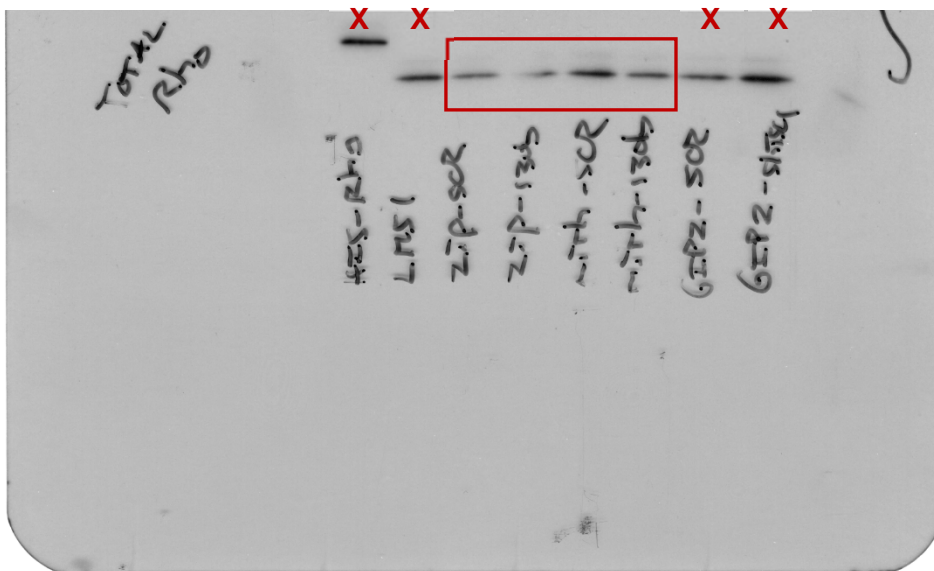

Unadjusted blot images for Supp Fig. 5B. Load order (L-R; boxed region): 1. SCR 2. miR-130b 3. SCR 4. miR-130b. Images are film exposures ranging from 20 s to 2 min.

**DICER1:**

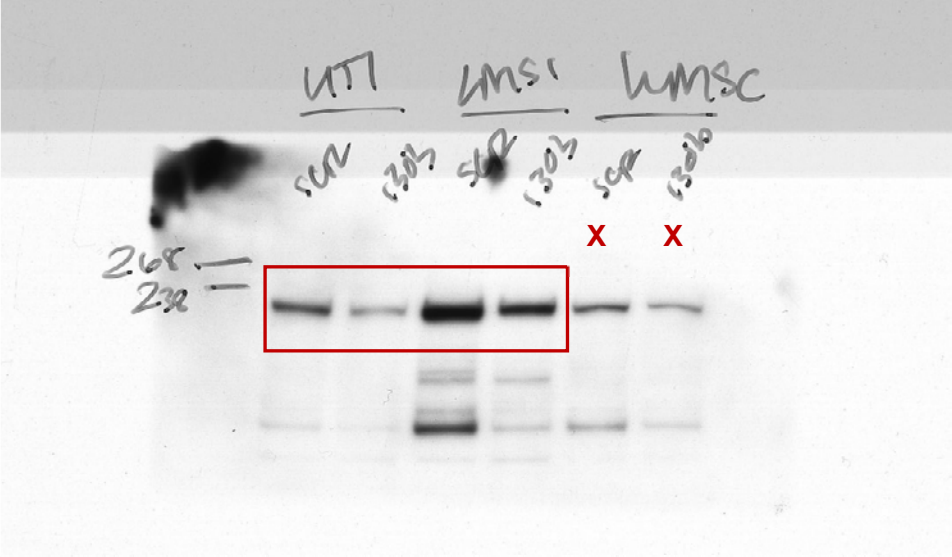

**Tubulin:**

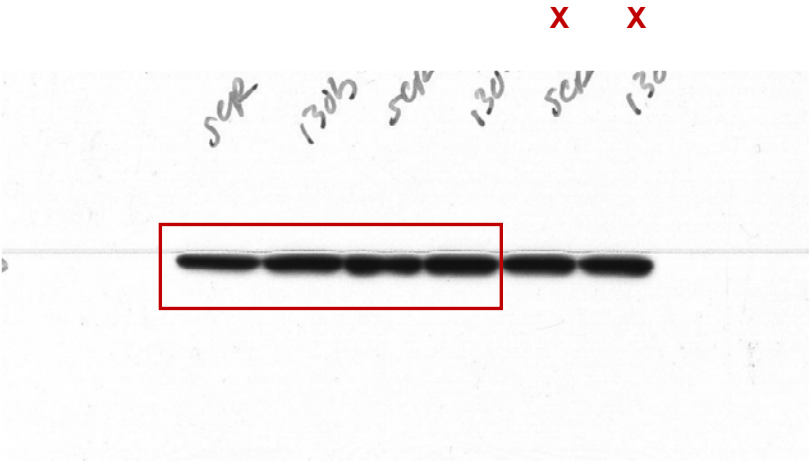

Supplement: pone.0278844.s011.pdf [file pone.0278844.s011.pdf]
